# Supplementary material
Source: PubMed Central journal article supplement (PMC10325098)
Supplement: NIHMS1638700-supplement-1.pdf [file NIHMS1638700-supplement-1.pdf]

**A**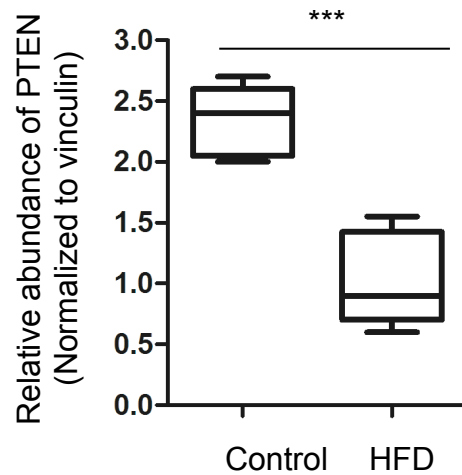**B**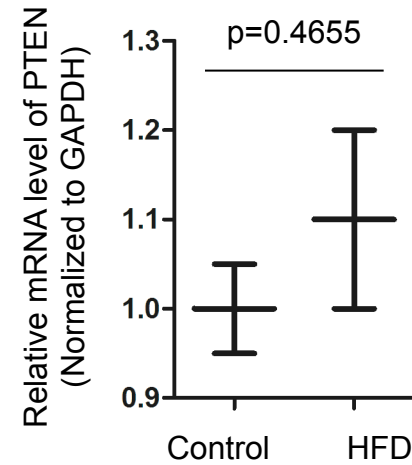

**Supplementary Figure 1. (A)** Relative PTEN protein levels from liver samples of 8 HFD-fed mice and 8 control mice were detected by IB with PTEN antibody, normalized to vinculin, and analyzed using One-way Anova. **(B)** Relative PTEN mRNA levels from liver samples of 5 HFD-fed mice and 5 control mice were detected by RT-qPCR. \*\*\*  $p < 0.001$ .

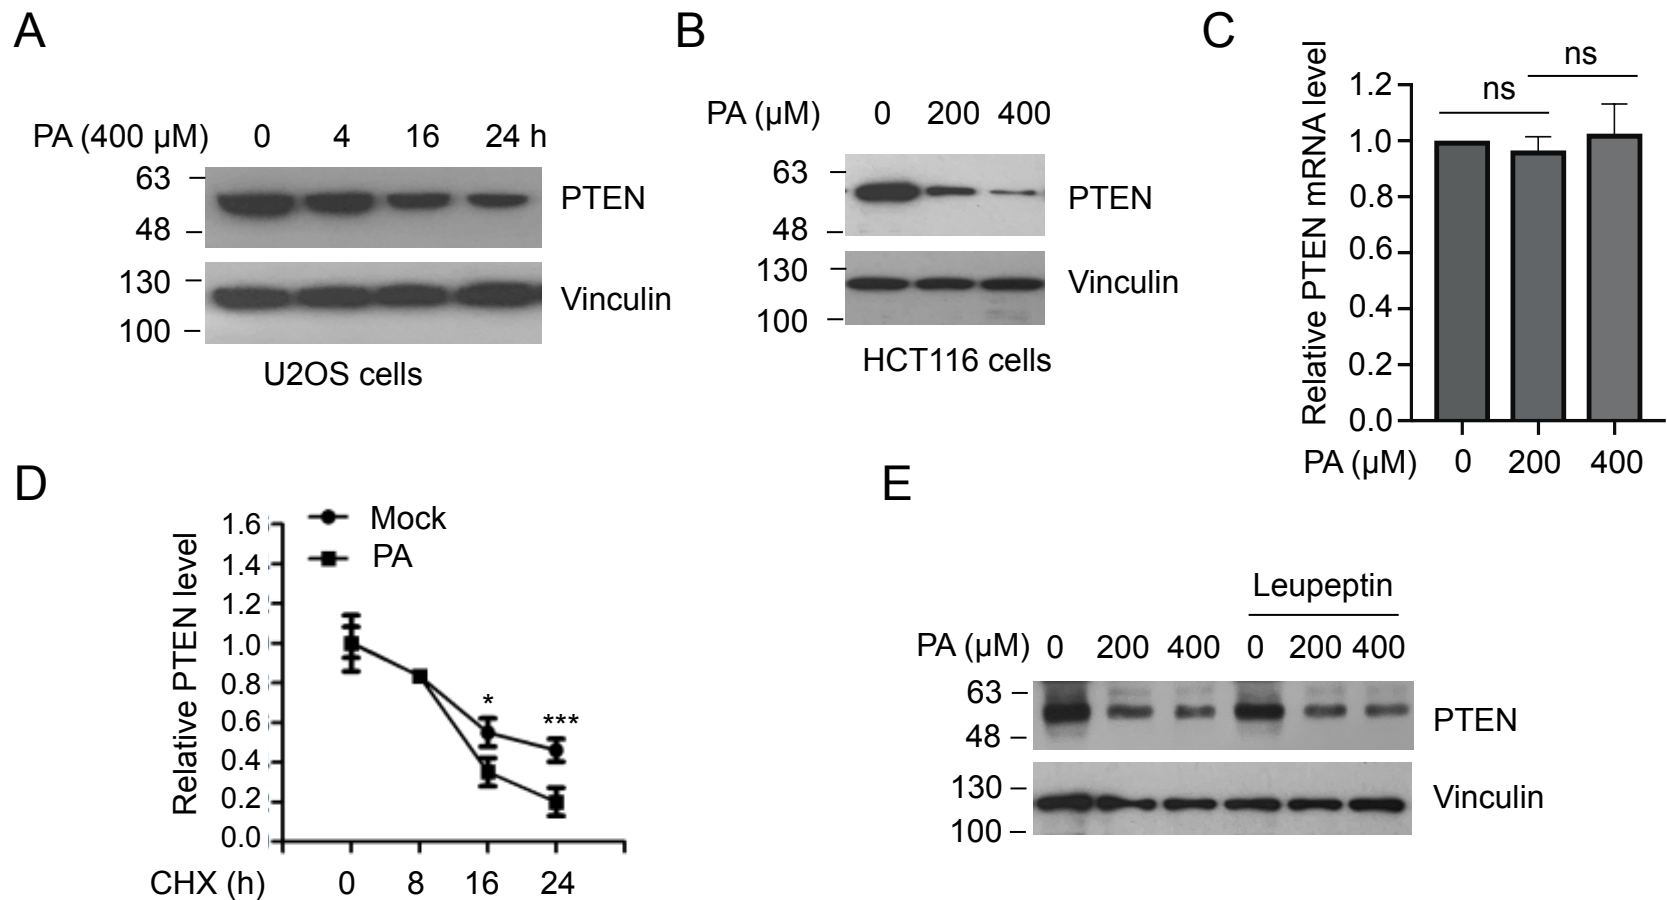

**Supplementary Figure 2.** (A) U2OS cells were exposed to 400  $\mu$ M PA for the indicated times and the PTEN protein levels were determined by IB analysis with PTEN antibody. (B) HCT116 cells were treated with increasing concentrations of PA and PTEN protein levels were determined by IB. (C) HCT116 cells were treated with PA and the mRNA level of PTEN was detected by RT-qPCR assay. NS, no significance. (D) U2OS cells, with or without 400  $\mu$ M PA, were treated with cycloheximide and the PTEN protein levels were determined at the indicated times following the treatment. (E) U2OS cells were treated with PA, with or without leupeptin, for 16 h. The level of PTEN was detected. \*  $p < 0.05$ ; \*\*\*  $p < 0.001$ .

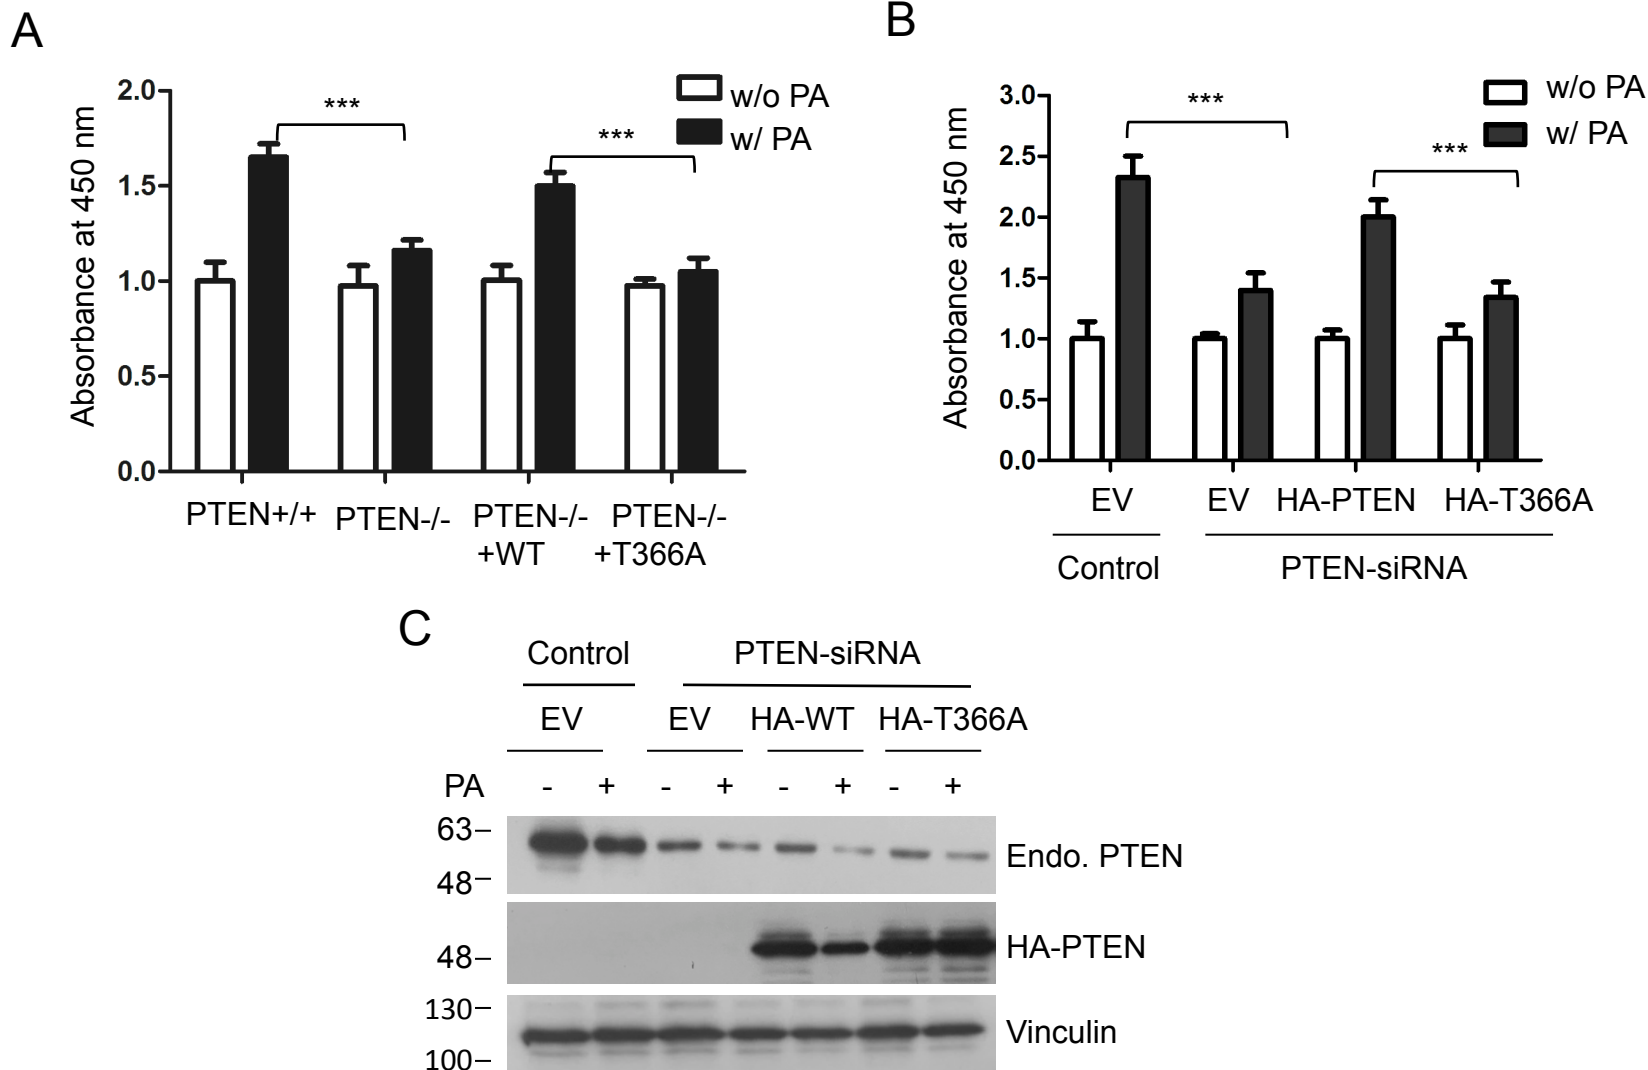

**Supplementary Figure 3. (A)** HCT116 PTEN<sup>+/+</sup> or PTEN<sup>-/-</sup> cells were treated with control or 400  $\mu$ M PA, transfected with wild type PTEN or T366A, and cell proliferation was determined by the CCK8 assay. **(B, C)** U2OS cells, transfected with PTEN-siRNA, wild type PTEN or T366A as indicated, were treated with control or 400  $\mu$ M PA. Cell proliferation was determined by the CCK8 assay. The levels of endogenous and transfected PTEN were determined by IB. \*\*\*  $p < 0.001$ .

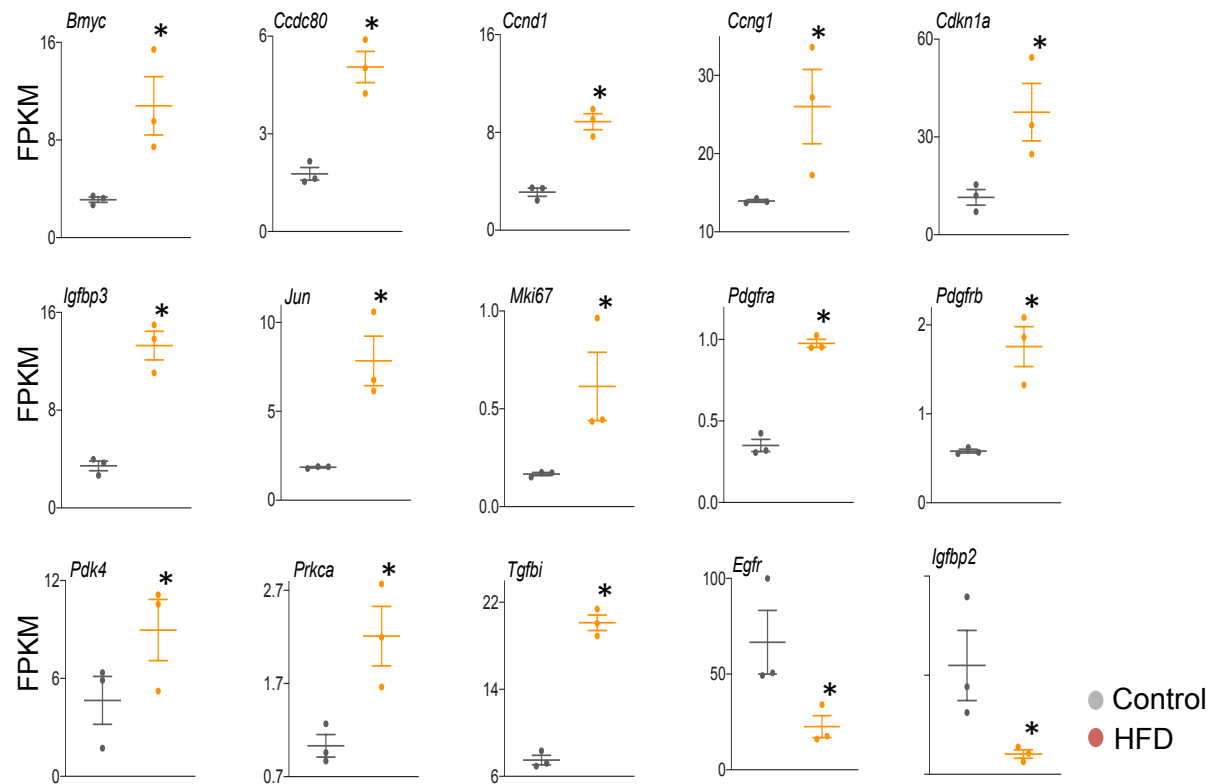

**Supplementary Figure 4. Select proliferation related liver genes dysregulated in HFD.** Absolute expression levels from RNA-seq data in FPKM of dysregulated genes in the livers of control and HFD fed male mice at 35 weeks (Reference: PMID: 26200659, the same HFD was referred to as LA-HFD in the study). Shown are 15 representative genes out of 203 proliferation related genes identified by comparison with Pubmed Gene lists. \* HFD values are significantly different from control (P and q-value  $\leq 0.05$ ).
